# Supplementary material
Source: PubMed Central journal article supplement (PMC5752864)
Supplement: AEM.02013-17_zam002188255s1.pdf [file AEM.02013-17_zam002188255s1.pdf]

## Supplemental Information

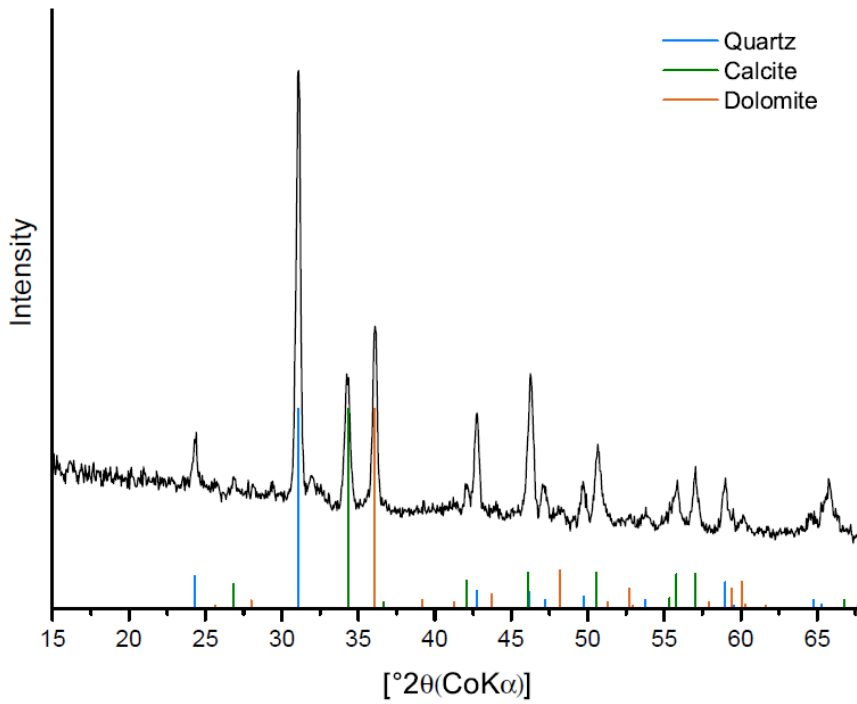

1

2 Figure S1.  $\mu$ XRD analysis of littoral Lake Constance sediment displaying a dominance of  
3 Quartz.

4

5 Table S1. Characteristics of Lake Constance sediment and water column

Sediment characteristics

|                      |                |
|----------------------|----------------|
| Porewater (%)        | $22.1 \pm 4.3$ |
| Silica (weight %)    | $54.8 \pm 2.2$ |
| Carbonate (weight %) | $17.5 \pm 1.3$ |
| Total Fe (weight %)  | $1.4 \pm 0.2$  |

Water column characteristics

|                           |                |
|---------------------------|----------------|
| pH                        | $8.2 \pm 0.1$  |
| DOC (mg/L)                | $1.8 \pm 0.0$  |
| Nitrate ( $\mu\text{M}$ ) | $52.5 \pm 1.1$ |

6

7
